# Supplementary material for: Association of Body Weight Variability with Adverse Cardiovascular Outcomes in Patients with Pre-Dialysis Chronic Kidney Disease
Source: MDPI journal article supplement (doi:10.3390/nu13103381), 2021-09-26
Supplement: s1 [file s1]

## Supplementary Materials

### Association of body weight variability with adverse cardiovascular outcomes in patients with pre-dialysis chronic kidney disease

Sang Heon Suh, M.D., Ph.D.<sup>1</sup>, Tae Ryom Oh, M.D., Ph.D.<sup>1</sup>, Hong Sang Choi, M.D., Ph.D.<sup>1</sup>, Chang Seong Kim, M.D., Ph.D.<sup>1</sup>, Eun Hui Bae, M.D., Ph.D.<sup>1</sup>, Sue K. Park, M.D., Ph.D.<sup>2,3,4</sup>, Yong-Soo Kim, M.D., Ph.D.<sup>5</sup>, Yeong Hoon Kim, M.D., Ph.D.<sup>6</sup>, Kyu Hun Choi, M.D., Ph.D.<sup>7</sup>, Kook-Hwan Oh, M.D., Ph.D.<sup>8</sup>, Seong Kwon Ma\*, M.D., Ph.D.<sup>1</sup>, and Soo Wan Kim\*, M.D., Ph.D.<sup>1</sup>, on behalf of the Korean Cohort Study for Outcomes in Patients With Chronic Kidney Disease (KNOW-CKD) Investigators

<sup>1</sup>Department of Internal Medicine, Chonnam National University Medical School and Chonnam National University Hospital, Gwangju, Korea

<sup>2</sup>Department of Preventive Medicine, Seoul National University College of Medicine, Seoul, Korea

<sup>3</sup>Cancer Research Institute, Seoul National University, Seoul, Korea

<sup>4</sup>Integrated Major in Innovative Medical Science, Seoul National University College of Medicine, Seoul, Korea

<sup>5</sup>Department of Internal Medicine, College of Medicine, Catholic University of Korea, Seoul, Korea

<sup>6</sup>Department of Internal Medicine, College of Medicine, Busan Paik Hospital, Inje University, Busan, Korea.

<sup>7</sup>Department of Internal Medicine, College of Medicine, Institute of Kidney Disease Research, Yonsei University, Seoul, Korea

<sup>8</sup>Department of Internal Medicine, Seoul National University Hospital, Seoul, Korea

**Running title:** BW variability and CV outcomes in CKD

#### Corresponding authors

\*Seong Kwon Ma, MD, PhD. Department of Internal Medicine, Chonnam National University Medical School, 42 Jebongro, Gwangju 61469, Korea, Tel: +82-62-220-6579, Fax: +82-62-225-8578, Email: drmsk@hanmail.net

\*Soo Wan Kim, MD, PhD. Department of Internal Medicine, Chonnam National University Medical School, 42 Jebongro, Gwangju 61469, Korea, Tel: +82-62-220-6271, Fax: +82-62-225-8578, Email: skimw@chonnam.ac.kr

#### Table of Contents

**Table S1. Baseline characteristics of study participants by BW slope**

**Table S2. Raw numbers for the composite outcome by enrollment sites**

**Table S3. Raw numbers for the composite outcome by subgroups**

**Table S4. Charlson Comorbidity Index components of study participants by BWV**

**Table S5. Cox proportional hazards regression of BWV for the fatal and non-fatal CV events in various subgroups**

**Table S6. Cox proportional hazards regression of BWV for all-cause mortality in various subgroups**

**Table S7. Multinomial logistic regression of BWV for longitudinal BW change**

**Table S8. Cox proportional hazards regression of BMI in addition to BWV for the outcomes**

Table S1. Baseline characteristics of study participants by BW slope

|                                    | BW change                   |                             |                             | P value |
|------------------------------------|-----------------------------|-----------------------------|-----------------------------|---------|
|                                    | Decrease                    | Maintenance                 | Increase                    |         |
| Annual rate of BW change (kg/year) | -1.540 ± 1.341              | -0.014 ± 0.290              | 1.360 ± 1.226               | < 0.001 |
| Age (year)                         | 55.184 ± 12.138             | 54.323 ± 11.507             | 50.558 ± 12.621             | < 0.001 |
| Male                               | 292 (61.7)                  | 249 (59.0)                  | 292 (62.9)                  | 0.322   |
| Charlson comorbidity index         |                             |                             |                             | 0.005   |
| 0 – 3                              | 325 (68.7)                  | 724 (77.8)                  | 334 (72.0)                  |         |
| ≥ 4                                | 148 (31.3)                  | 206 (22.2)                  | 130 (28.0)                  |         |
| DM                                 | 184 (38.9)                  | 243 (26.1)                  | 165 (35.6)                  | < 0.001 |
| CAD                                | 33 (7.0)                    | 45 (4.8)                    | 29 (6.3)                    | 0.564   |
| Arrhythmia                         | 22 (4.7)                    | 14 (1.5)                    | 8 (1.7)                     | < 0.001 |
| Current smoking                    | 76 (16.1)                   | 147 (15.8)                  | 66 (14.2)                   | 0.684   |
| BMI (kg/m <sup>2</sup> )           | 25.502 ± 3.411              | 24.216 ± 3.106              | 24.335 ± 3.622              | < 0.001 |
| WC (cm)                            | 84.533 ± 21.573             | 80.728 ± 23.086             | 83.630 ± 20.785             | 0.004   |
| SBP (mmHg)                         | 127.159 ± 17.202            | 126.123 ± 15.172            | 126.970 ± 15.864            | 0.432   |
| DBP (mmHg)                         | 76.233 ± 11.860             | 76.486 ± 10.778             | 77.183 ± 10.985             | 0.388   |
| Medications                        |                             |                             |                             |         |
| ACEi/ARBs                          | 407 (86.0)                  | 808 (86.9)                  | 403 (86.9)                  | 0.901   |
| Diuretics                          | 169 (35.7)                  | 258 (27.7)                  | 147 (31.7)                  | 0.008   |
| Number of anti-HTN drugs ≥ 3       | 151 (31.9)                  | 228 (24.5)                  | 141 (30.4)                  | 0.005   |
| Laboratory findings                |                             |                             |                             |         |
| Hemoglobin (g/dL)                  | 12.727 ± 1.984              | 13.138 ± 1.888              | 12.984 ± 2.080              | 0.001   |
| Albumin (g/dL)                     | 4.136 ± 0.429               | 4.245 ± 0.349               | 4.234 ± 0.387               | < 0.001 |
| Total cholesterol (mg/dL)          | 174.339 ± 383.063           | 173.124 ± 37.378            | 174.365 ± 38.011            | 0.782   |
| LDL cholesterol (mg/dL)            | 96.524 ± 332.109            | 95.456 ± 30.116             | 97.562 ± 30.129             | 0.477   |
| HDL cholesterol (mg/dL)            | 48.615 ± 15.045             | 50.459 ± 15.797             | 48.732 ± 14.502             | 0.044   |
| Triglyceride (mg/dL)               | 168.609 ± 102.519           | 151.492 ± 94.493            | 155.793 ± 102.683           | 0.009   |
| Fasting glucose (mg/dL)            | 113.837 ± 43.259            | 107.142 ± 31.613            | 111.446 ± 45.172            | 0.006   |
| hsCRP (mg/dL)                      | 0.8000 [0.300, 2.000]       | 0.545 [0.200, 1.500]        | 0.600 [0.200, 1.500]        | 0.307   |
| 25(OH) vitamin D (ng/dL)           | 17.866 ± 7.749              | 18.640 ± 8.179              | 16.974 ± 6.939              | 0.001   |
| 24-hr urine protein (mg/dL)        | 738.900 [292.450]           | 430.400 [152.350, 1085.250] | 490.900 [138.000, 1345.550] | < 0.001 |
| Urine ACR (mg/g Cr)                | 494.728 [162.643, 1303.109] | 270.194 [49.640, 741.250]   | 255.451 [60.281, 843.487]   | < 0.001 |
| eGFR (mL/min./1.73m <sup>2</sup> ) | 46.196 ± 29.051             | 54.223 ± 28.237             | 55.637 ± 31.307             | < 0.001 |

Table S1. (Continued)

|            | BW change  |             |           | P value |
|------------|------------|-------------|-----------|---------|
|            | Decrease   | Maintenance | Increase  |         |
| CKD stages |            |             |           | < 0.001 |
| Stage 1    | 62 (13.1)  | 159 (17.1)  | 95 (20.5) |         |
| Stage 2    | 65 (13.7)  | 218 (23.4)  | 97 (20.9) |         |
| Stage 3a   | 73 (15.4)  | 168 (18.1)  | 90 (19.4) |         |
| Stage 3b   | 114 (24.1) | 216 (23.2)  | 83 (17.9) |         |
| Stage 4    | 130 (27.5) | 150 (16.1)  | 85 (18.3) |         |
| Stage 5    | 29 (6.1)   | 19 (2.0)    | 14 (3.0)  |         |

Note: Values for categorical variables are given as number (percentage); values for continuous variables, as mean ± standard deviation or median [interquartile range].  
Abbreviations: ACEi, angiotensin-converting enzyme inhibitor; ACR, albumin-to-creatinine ratio; ARB, angiotensin receptor blocker; BMI, body mass index; CAD, coronary artery disease; CCI, Charlson comorbidity index; CKD, chronic kidney disease; DBP, diastolic blood pressure; DM, diabetes mellitus; eGFR, estimated glomerular filtration rate; hsCRP, high-sensitivity C-reactive protein; SBP, systolic blood pressure; WC, waist circumference.

**Table S2. Raw numbers for the composite outcome by enrollment sites**

|             | Site 1 | Site 2 | Site 3 | Site 4 | Site 5 | Site 6 | Site 7 | Site 8 | Site 9 | P value |
|-------------|--------|--------|--------|--------|--------|--------|--------|--------|--------|---------|
| Event cases | 17     | 8      | 19     | 17     | 10     | 8      | 14     | 48     | 22     | 0.592   |
| Total cases | 125    | 112    | 199    | 164    | 137    | 109    | 199    | 588    | 234    |         |

Note: Values are given as raw number.

Table S3. Raw numbers for the composite outcome by subgroups

|                               |              | Event cases | Total cases |
|-------------------------------|--------------|-------------|-------------|
| All subjects                  | Low BWV      | 30          | 496         |
|                               | Moderate BWV | 83          | 934         |
|                               | High BWV     | 50          | 464         |
| Age < 60 years                | Low BWV      | 13          | 297         |
|                               | Moderate BWV | 32          | 606         |
|                               | High BWV     | 21          | 316         |
| Age ≥ 60 years                | Low BWV      | 17          | 172         |
|                               | Moderate BWV | 51          | 328         |
|                               | High BWV     | 29          | 148         |
| Male                          | Low BWV      | 22          | 278         |
|                               | Moderate BWV | 58          | 556         |
|                               | High BWV     | 35          | 299         |
| Female                        | Low BWV      | 8           | 191         |
|                               | Moderate BWV | 25          | 378         |
|                               | High BWV     | 15          | 165         |
| CCI ≤ 3                       | Low BWV      | 12          | 360         |
|                               | Moderate BWV | 49          | 710         |
|                               | High BWV     | 23          | 313         |
| CCI ≥ 4                       | Low BWV      | 18          | 109         |
|                               | Moderate BWV | 34          | 224         |
|                               | High BWV     | 27          | 151         |
| DM (-)                        | Low BWV      | 13          | 344         |
|                               | Moderate BWV | 46          | 654         |
|                               | High BWV     | 19          | 277         |
| DM (+)                        | Low BWV      | 17          | 125         |
|                               | Moderate BWV | 37          | 280         |
|                               | High BWV     | 31          | 187         |
| BMI < 25 (kg/m <sup>2</sup> ) | Low BWV      | 20          | 300         |
|                               | Moderate BWV | 52          | 561         |
|                               | High BWV     | 24          | 215         |
| BMI ≥ 25 (kg/m <sup>2</sup> ) | Low BWV      | 10          | 169         |
|                               | Moderate BWV | 31          | 373         |
|                               | High BWV     | 26          | 249         |

Table S3. (Continued)

|                                           |              | Event cases | Total cases |
|-------------------------------------------|--------------|-------------|-------------|
| Diuretics (-)                             | Low BWV      | 17          | 320         |
|                                           | Moderate BWV | 57          | 668         |
|                                           | High BWV     | 27          | 305         |
| Diuretics (+)                             | Low BWV      | 13          | 149         |
|                                           | Moderate BWV | 26          | 266         |
|                                           | High BWV     | 23          | 159         |
| Number of anti-HTN drugs $\leq 2$         | Low BWV      | 24          | 354         |
|                                           | Moderate BWV | 53          | 690         |
|                                           | High BWV     | 31          | 303         |
| Number of anti-HTN drugs $\geq 3$         | Low BWV      | 6           | 115         |
|                                           | Moderate BWV | 30          | 244         |
|                                           | High BWV     | 19          | 161         |
| eGFR $\geq 45$ mL/min./1.73m <sup>2</sup> | Low BWV      | 9           | 216         |
|                                           | Moderate BWV | 39          | 509         |
|                                           | High BWV     | 20          | 238         |
| eGFR $< 45$ mL/min./1.73m <sup>2</sup>    | Low BWV      | 21          | 226         |
|                                           | Moderate BWV | 44          | 425         |
|                                           | High BWV     | 30          | 253         |
| Random urine ACR $< 300$ mg/g             | Low BWV      | 10          | 220         |
|                                           | Moderate BWV | 49          | 456         |
|                                           | High BWV     | 19          | 211         |
| Random urine ACR $\geq 300$ mg/g          | Low BWV      | 19          | 235         |
|                                           | Moderate BWV | 35          | 437         |
|                                           | High BWV     | 30          | 238         |

Note: Values are given as raw number.

Abbreviations: ACR, Albumin-to-creatinine ratio; BMI, body mass index; CCI, Charlson comorbidity index; CI, confidence interval; DM, diabetes mellitus; HTN, hypertension; eGFR, estimated glomerular filtration rate.

**Table S4. Charlson Comorbidity Index components of study participants by BWV**

|                                                     | <b>BWV</b> |            |            | <b>P value</b> |
|-----------------------------------------------------|------------|------------|------------|----------------|
|                                                     | Low        | Moderate   | High       |                |
| Myocardial infarction                               | 8 (1.7)    | 10 (1.1)   | 7 (1.5)    | 0.581          |
| Congestive Heart Failure                            | 3 (0.6)    | 8 (0.9)    | 8 (1.7)    | 0.201          |
| Peripheral vascular disease                         | 11 (2.3)   | 37 (4.0)   | 17 (3.7)   | 0.288          |
| Cerebrovascular disease                             | 23 (4.9)   | 43 (4.6)   | 41 (8.8)   | 0.004          |
| Dementia                                            | 1 (0.2)    | 0 (0.0)    | 0 (0.0)    | 0.225          |
| COPD                                                | 1 (0.2)    | 7 (0.7)    | 1 (0.2)    | 0.248          |
| Connective tissue disease                           | 26 (5.5)   | 56 (6.0)   | 32 (6.9)   | 0.676          |
| Peptic ulcer disease                                | 8 (1.7)    | 18 (1.9)   | 7 (1.5)    | 0.849          |
| Mild liver disease                                  | 10 (2.1)   | 19 (2.0)   | 15 (3.2)   | 0.355          |
| Moderate-to-severe liver disease or Liver cirrhosis | 0 (0.0)    | 2 (0.2)    | 0 (0.0)    | 0.368          |
| Diabetes without complication                       | 20 (4.3)   | 53 (5.7)   | 32 (6.2)   | 0.217          |
| Diabetes with organ damage                          | 105 (22.4) | 226 (24.2) | 155 (33.4) | < 0.001        |
| Hemiplegia                                          | 3 (0.6)    | 2 (0.2)    | 4 (0.9)    | 0.219          |
| Moderate-to-severe renal disease                    | 348 (74.2) | 626 (67.0) | 320 (69.0) | 0.022          |
| Any tumor within last 5 years                       | 0 (0.0)    | 0 (0.0)    | 0 (0.0)    |                |
| Lymphoma                                            | 0 (0.0)    | 0 (0.0)    | 0 (0.0)    |                |
| Leukemia                                            | 0 (0.0)    | 0 (0.0)    | 0 (0.0)    |                |
| Metastatic solid tumor                              | 0 (0.0)    | 0 (0.0)    | 0 (0.0)    |                |
| AIDS                                                | 0 (0.0)    | 0 (0.0)    | 0 (0.0)    |                |

Note: Values for categorical variables are given as number (percentage).

Abbreviations: AIDS, acquired immunodeficiency syndrome; COPD, chronic obstructive pulmonary disease.

Table S5. Cox proportional hazards regression of BWV for the fatal and non-fatal CV events in various subgroups

|                               |              | Unadjusted           |         | Adjusted              |         |
|-------------------------------|--------------|----------------------|---------|-----------------------|---------|
|                               |              | HR (95%CI)           | P value | HR (95%CI)            | P value |
| Age < 60 years                | Low BWV      | 1.810 (0.816, 4.011) | 0.144   | 0.573 (0.174, 1.888)  | 0.360   |
|                               | Moderate BWV | Reference            |         | Reference             |         |
|                               | High BWV     | 1.689 (0.889, 3.208) | 0.109   | 0.747 (0.252, 2.217)  | 0.599   |
| Age ≥ 60 years                | Low BWV      | 1.137 (0.582, 2.221) | 0.708   | 1.380 (0.586, 3.251)  | 0.462   |
|                               | Moderate BWV | Reference            |         | Reference             |         |
|                               | High BWV     | 2.181 (1.284, 3.704) | 0.004   | 2.191 (1.054, 4.557)  | 0.036   |
| Male                          | Low BWV      | 1.894 (0.986, 3.639) | 0.055   | 1.770 (0.772, 4.059)  | 0.178   |
|                               | Moderate BWV | Reference            |         | Reference             |         |
|                               | High BWV     | 1.529 (0.944, 2.476) | 0.084   | 1.865 (1.020, 3.412)  | 0.043   |
| Female                        | Low BWV      | 0.713 (0.300, 1.695) | 0.444   | 0.361 (0.074, 1.770)  | 0.209   |
|                               | Moderate BWV | Reference            |         | Reference             |         |
|                               | High BWV     | 2.631 (1.206, 5.741) | 0.015   | 0.615 (0.153, 2.476)  | 0.493   |
| CCI ≤ 3                       | Low BWV      | 0.974 (0.454, 2.087) | 0.946   | 0.915 (0.307, 2.728)  | 0.874   |
|                               | Moderate BWV | Reference            |         | Reference             |         |
|                               | High BWV     | 2.239 (1.230, 4.075) | 0.008   | 1.901 (0.810, 4.460)  | 0.140   |
| CCI ≥ 4                       | Low BWV      | 1.851 (0.916, 3.742) | 0.086   | 4.447 (1.547, 12.786) | 0.006   |
|                               | Moderate BWV | Reference            |         | Reference             |         |
|                               | High BWV     | 1.560 (0.878, 2.770) | 0.129   | 1.962 (0.908, 4.238)  | 0.086   |
| DM (-)                        | Low BWV      | 1.261 (0.604, 2.630) | 0.537   | 1.626 (0.576, 4.587)  | 0.359   |
|                               | Moderate BWV | Reference            |         | Reference             |         |
|                               | High BWV     | 1.946 (1.000, 3.788) | 0.050   | 1.548 (0.575, 4.165)  | 0.387   |
| DM (+)                        | Low BWV      | 1.347 (0.661, 2.473) | 0.412   | 2.099 (0.699, 6.300)  | 0.186   |
|                               | Moderate BWV | Reference            |         | Reference             |         |
|                               | High BWV     | 1.687 (0.989, 2.878) | 0.055   | 2.300 (1.147, 4.612)  | 0.019   |
| BMI < 25 (kg/m <sup>2</sup> ) | Low BWV      | 1.484 (0.789, 2.789) | 0.220   | 2.131 (0.924, 4.914)  | 0.076   |
|                               | Moderate BWV | Reference            |         | Reference             |         |
|                               | High BWV     | 1.963 (1.109, 3.475) | 0.021   | 1.923 (0.900, 4.113)  | 0.092   |
| BMI ≥ 25 (kg/m <sup>2</sup> ) | Low BWV      | 0.996 (0.407, 2.436) | 0.993   | 1.138 (0.284, 4.565)  | 0.855   |
|                               | Moderate BWV | Reference            |         | Reference             |         |
|                               | High BWV     | 1.602 (0.880, 2.914) | 0.123   | 3.048 (1.181, 7.869)  | 0.021   |



Table S5. (continued)

|                                               |                     | Unadjusted           |         | Adjusted              |         |
|-----------------------------------------------|---------------------|----------------------|---------|-----------------------|---------|
|                                               |                     | HR (95%CI)           | P value | HR (95%CI)            | P value |
| <b>Diuretics (-)</b>                          | <b>Low BWV</b>      | 1.716 (0.872, 3.376) | 0.118   | 2.286 (0.938, 5.572)  | 0.069   |
|                                               | <b>Moderate BWV</b> | Reference            |         | Reference             |         |
|                                               | <b>High BWV</b>     | 3.041 (1.659, 5.573) | < 0.001 | 2.515 (1.165, 5.428)  | 0.019   |
| <b>Diuretics (+)</b>                          | <b>Low BWV</b>      | 0.997 (0.448, 2.221) | 0.995   | 0.677 (0.201, 2.280)  | 0.529   |
|                                               | <b>Moderate BWV</b> | Reference            |         | Reference             |         |
|                                               | <b>High BWV</b>     | 1.365 (0.747, 2.496) | 0.312   | 1.106 (0.469, 2.608)  | 0.817   |
| <b>Number of anti-HTN drugs ≤2</b>            | <b>Low BWV</b>      | 1.332 (0.738, 2.406) | 0.342   | 1.715 (0.811, 3.629)  | 0.158   |
|                                               | <b>Moderate BWV</b> | Reference            |         | Reference             |         |
|                                               | <b>High BWV</b>     | 1.637 (0.981, 2.732) | 0.059   | 1.615 (0.817, 3.194)  | 0.168   |
| <b>Number of anti-HTN drugs ≥ 3</b>           | <b>Low BWV</b>      | 0.986 (0.339, 2.870) | 0.980   | 0.889 (0.118, 6.728)  | 0.909   |
|                                               | <b>Moderate BWV</b> | Reference            |         | Reference             |         |
|                                               | <b>High BWV</b>     | 2.504 (1.264, 4.963) | 0.009   | 7.993 (2.145, 29.779) | 0.002   |
| <b>eGFR ≥ 45 mL/min./1.73m<sup>2</sup></b>    | <b>Low BWV</b>      | 1.651 (0.630, 4.327) | 0.308   | 0.285 (0.061, 1.340)  | 0.112   |
|                                               | <b>Moderate BWV</b> | Reference            |         | Reference             |         |
|                                               | <b>High BWV</b>     | 1.976 (1.063, 3.671) | 0.031   | 2.142 (0.920, 4.991)  | 0.077   |
| <b>eGFR &lt; 45 mL/min./1.73m<sup>2</sup></b> | <b>Low BWV</b>      | 1.201 (0.648, 2.224) | 0.561   | 1.668 (0.734, 3.793)  | 0.222   |
|                                               | <b>Moderate BWV</b> | Reference            |         | Reference             |         |
|                                               | <b>High BWV</b>     | 1.847 (1.073, 3.179) | 0.027   | 2.195 (1.051, 4.582)  | 0.036   |
| <b>Random urine ACR &lt; 300 mg/g</b>         | <b>Low BWV</b>      | 1.583 (0.723, 3.464) | 0.251   | 2.915 (0.982, 8.648)  | 0.054   |
|                                               | <b>Moderate BWV</b> | Reference            |         | Reference             |         |
|                                               | <b>High BWV</b>     | 2.111 (1.130, 3.944) | 0.019   | 2.219 (0.921, 5.348)  | 0.076   |
| <b>Random urine ACR ≥ 300 mg/g</b>            | <b>Low BWV</b>      | 1.061 (0.536, 2.099) | 0.865   | 1.321 (0.506, 3.445)  | 0.570   |
|                                               | <b>Moderate BWV</b> | Reference            |         | Reference             |         |
|                                               | <b>High BWV</b>     | 1.554 (0.890, 2.715) | 0.121   | 1.932 (0.913, 4.091)  | 0.085   |

Note: Models were adjusted for age, gender, Charlson comorbidity index, history of DM, smoking history, BMI, SBP, DBP, Medications (ACEi/ARBs, diuretics, Number of antihypertensive drugs), hemoglobin, albumin, HDL-cholesterol, triglycerides, fasting serum glucose, hs-CRP, 25(OH) vitamin D levels, eGFR, and 24-hour urine protein. Abbreviations: ACR, Albumin-to-creatinine ratio; BMI, body mass index; CCI, Charlson comorbidity index; CI, confidence interval; DM, diabetes mellitus; HTN, hypertension; eGFR, estimated glomerular filtration rate.

Table S6. Cox proportional hazards regression of BWV for all-cause mortality in various subgroups

|                               |              | Unadjusted           |         | Adjusted             |         |
|-------------------------------|--------------|----------------------|---------|----------------------|---------|
|                               |              | HR (95%CI)           | P value | HR (95%CI)           | P value |
| Age < 60 years                | Low BWV      | 0.994 (0.316, 3.124) | 0.992   | 0.508 (0.139, 1.862) | 0.307   |
|                               | Moderate BWV | Reference            |         | Reference            |         |
|                               | High BWV     | 1.101 (0.407, 2.980) | 0.850   | 0.888 (0.278, 2.843) | 0.888   |
| Age ≥ 60 years                | Low BWV      | 0.960 (0.461, 1.999) | 0.912   | 0.998 (0.466, 2.138) | 0.995   |
|                               | Moderate BWV | Reference            |         | Reference            |         |
|                               | High BWV     | 2.182 (1.238, 3.845) | 0.007   | 2.438 (1.324, 4.490) | 0.004   |
| Male                          | Low BWV      | 1.061 (0.511, 2.205) | 0.873   | 0.950 (0.446, 2.025) | 0.895   |
|                               | Moderate BWV | Reference            |         | Reference            |         |
|                               | High BWV     | 1.625 (0.914, 2.890) | 0.098   | 2.039 (1.093, 3.807) | 0.025   |
| Female                        | Low BWV      | 0.984 (0.308, 3.137) | 0.978   | 1.064 (0.316, 3.582) | 0.920   |
|                               | Moderate BWV | Reference            |         | Reference            |         |
|                               | High BWV     | 1.780 (0.702, 4.511) | 0.224   | 1.374 (0.451, 4.186) | 0.576   |
| CCI ≤ 3                       | Low BWV      | 0.878 (0.351, 2.201) | 0.782   | 0.736 (0.308, 2.058) | 0.638   |
|                               | Moderate BWV | Reference            |         | Reference            |         |
|                               | High BWV     | 1.733 (0.855, 3.512) | 0.127   | 2.636 (1.227, 5.662) | 0.013   |
| CCI ≥ 4                       | Low BWV      | 1.113 (0.480, 2.578) | 0.804   | 0.983 (0.393, 2.461) | 0.971   |
|                               | Moderate BWV | Reference            |         | Reference            |         |
|                               | High BWV     | 1.311 (0.662, 2.595) | 0.437   | 1.556 (0.714, 3.390) | 0.266   |
| DM (-)                        | Low BWV      | 1.306 (0.586, 2.910) | 0.513   | 1.022 (0.441, 2.370) | 0.959   |
|                               | Moderate BWV | Reference            |         | Reference            |         |
|                               | High BWV     | 1.408 (0.649, 3.053) | 0.386   | 1.701 (0.736, 3.933) | 0.214   |
| DM (+)                        | Low BWV      | 0.761 (0.282, 2.051) | 0.589   | 0.682 (0.245, 1.898) | 0.463   |
|                               | Moderate BWV | Reference            |         | Reference            |         |
|                               | High BWV     | 1.580 (0.829, 3.011) | 0.164   | 1.707 (0.815, 3.576) | 0.156   |
| BMI < 25 (kg/m <sup>2</sup> ) | Low BWV      | 1.050 (0.481, 2.293) | 0.903   | 0.902 (0.300, 2.713) | 0.855   |
|                               | Moderate BWV | Reference            |         | Reference            |         |
|                               | High BWV     | 2.361 (1.245, 4.479) | 0.009   | 3.413 (1.372, 8.491) | 0.008   |
| BMI ≥ 25 (kg/m <sup>2</sup> ) | Low BWV      | 0.972 (0.353, 2.677) | 0.956   | 0.846 (0.293, 2.448) | 0.758   |
|                               | Moderate BWV | Reference            |         | Reference            |         |
|                               | High BWV     | 1.160 (0.543, 2.479) | 0.701   | 1.129 (0.476, 2.677) | 0.783   |

Table S6. (continued)

|                                      |              | Unadjusted           |         | Adjusted             |         |
|--------------------------------------|--------------|----------------------|---------|----------------------|---------|
|                                      |              | HR (95%CI)           | P value | HR (95%CI)           | P value |
| Diuretics (-)                        | Low BWV      | 1.334 (0.599, 2.971) | 0.480   | 1.203 (0.524, 2.763) | 0.663   |
|                                      | Moderate BWV | Reference            |         | Reference            |         |
|                                      | High BWV     | 1.812 (0.901, 3.645) | 0.095   | 1.993 (0.941, 4.218) | 0.071   |
| Diuretics (+)                        | Low BWV      | 0.684 (0.253, 1.848) | 0.454   | 0.733 (0.251, 2.139) | 0.570   |
|                                      | Moderate BWV | Reference            |         | Reference            |         |
|                                      | High BWV     | 1.435 (0.723, 2.849) | 0.302   | 1.574 (0.682, 3.631) | 0.288   |
| Number of anti-HTN drugs ≤2          | Low BWV      | 1.122 (0.511, 2.466) | 0.774   | 1.064 (0.474, 2.389) | 0.880   |
|                                      | Moderate BWV | Reference            |         | Reference            |         |
|                                      | High BWV     | 1.847 (0.945, 3.609) | 0.073   | 1.773 (0.854, 3.681) | 0.124   |
| Number of anti-HTN drugs ≥ 3         | Low BWV      | 0.930 (0.340, 2.542) | 0.887   | 0.674 (0.208, 2.189) | 0.512   |
|                                      | Moderate BWV | Reference            |         | Reference            |         |
|                                      | High BWV     | 1.267 (0.617, 2.600) | 0.519   | 1.837 (0.770, 4.382) | 0.170   |
| eGFR ≥ 45 mL/min./1.73m <sup>2</sup> | Low BWV      | 0.779 (0.165, 3.672) | 0.753   | 0.624 (0.123, 3.161) | 0.569   |
|                                      | Moderate BWV | Reference            |         | Reference            |         |
|                                      | High BWV     | 2.623 (1.035, 6.647) | 0.042   | 2.459 (0.784, 7.709) | 0.123   |
| eGFR < 45 mL/min./1.73m <sup>2</sup> | Low BWV      | 0.959 (0.486, 1.892) | 0.903   | 0.906 (0.442, 1.855) | 0.786   |
|                                      | Moderate BWV | Reference            |         | Reference            |         |
|                                      | High BWV     | 1.449 (0.808, 2.599) | 0.213   | 1.409 (0.743, 2.673) | 0.294   |
| Random urine ACR < 300 mg/g          | Low BWV      | 1.087 (0.451, 2.623) | 0.853   | 0.989 (0.385, 2.543) | 0.982   |
|                                      | Moderate BWV | Reference            |         | Reference            |         |
|                                      | High BWV     | 1.857 (0.915, 3.768) | 0.086   | 2.580 (1.177, 5.660) | 0.018   |
| Random urine ACR ≥ 300 mg/g          | Low BWV      | 1.025 (0.426, 2.463) | 0.956   | 1.030 (0.403, 2.631) | 0.950   |
|                                      | Moderate BWV | Reference            |         | Reference            |         |
|                                      | High BWV     | 1.546 (0.769, 3.112) | 0.222   | 1.679 (0.730, 3.859) | 0.222   |

Note: Models were adjusted for age, gender, Charlson comorbidity index, history of DM, smoking history, BMI, SBP, DBP, Medications (ACEi/ARBs, diuretics, Number of antihypertensive drugs), hemoglobin, albumin, HDL-cholesterol, triglycerides, fasting serum glucose, hs-CRP, 25(OH) vitamin D levels, eGFR, and 24-hour urine protein. Abbreviations: ACR, Albumin-to-creatinine ratio; BMI, body mass index; CCI, Charlson comorbidity index; CI, confidence interval; DM, diabetes mellitus; HTN, hypertension; eGFR, estimated glomerular filtration rate.

Table S7. Multinomial logistic regression of BWV for longitudinal BW change

|            |               | BW decrease vs. BW maintenance |         | BW increase vs. BW maintenance |         |
|------------|---------------|--------------------------------|---------|--------------------------------|---------|
|            |               | OR (95%CI)                     | P value | OR (95%CI)                     | P value |
| Unadjusted | BWV, low      | 0.412 (0.304, 0.558)           | < 0.001 | 0.481 (0.356, 0.649)           | < 0.001 |
|            | BWV, moderate | Reference                      |         | Reference                      |         |
|            | BWV, high     | 2.598 (1.966, 3.432)           | < 0.001 | 2.907 (2.198, 3.846)           | < 0.001 |
| Adjusted   | BWV, low      | 0.429 (0.300, 0.614)           | < 0.001 | 0.541 (0.384, 0.763)           | < 0.001 |
|            | BWV, moderate | Reference                      |         | Reference                      |         |
|            | BWV, high     | 2.310 (1.661, 3.213)           | < 0.001 | 2.642 (1.912, 3.652)           | < 0.001 |

Note: Models were adjusted for age, gender, Charlson comorbidity index, history of DM, smoking history, BMI, SBP, DBP, Medications (ACEi/ARBs, diuretics, number of antihypertensive drugs), hemoglobin, albumin, HDL-cholesterol, triglycerides, fasting serum glucose, hs-CRP, 25(OH) vitamin D levels, eGFR, and 24-hour urine protein.  
Abbreviations: ACR, Albumin-to-creatinine ratio; BMI, body mass index; CCI, Charlson comorbidity index; CI, confidence interval; DM, diabetes mellitus; HTN, hypertension; eGFR, estimated glomerular filtration rate.

Table S8. Cox proportional hazards regression of BMI in addition to BWV for the outcomes

|                                      |                                                       | Unadjusted           |         | Adjusted             |         |
|--------------------------------------|-------------------------------------------------------|----------------------|---------|----------------------|---------|
|                                      |                                                       | HR (95%CI)           | P value | HR (95%CI)           | P value |
| <b>Composite outcome</b>             | <b>Low BWV</b>                                        | 1.236 (0.743, 2.056) | 0.416   | 1.455 (0.795, 2.663) | 0.224   |
|                                      | <b>Moderate BWV</b>                                   | Reference            |         | Reference            |         |
|                                      | <b>High BWV, BMI 20 - 24.9 kg/m<sup>2</sup></b>       | 1.967 (1.205, 3.210) | 0.007   | 1.482 (0.808, 2.721) | 0.204   |
|                                      | <b>High BWV, BMI &lt; 20 or ≥ 25 kg/m<sup>2</sup></b> | 1.592 (0.917, 2.766) | 0.099   | 2.149 (1.107, 4.173) | 0.024   |
| <b>Fatal and non-fatal CV events</b> | <b>Low BWV</b>                                        | 1.281 (0.771, 2.131) | 0.339   | 1.602 (0.884, 2.902) | 0.120   |
|                                      | <b>Moderate BWV</b>                                   | Reference            |         | Reference            |         |
|                                      | <b>High BWV, BMI 20 - 24.9 kg/m<sup>2</sup></b>       | 1.998 (1.225, 3.258) | 0.006   | 1.582 (0.873, 2.868) | 1.582   |
|                                      | <b>High BWV, BMI &lt; 20 or ≥ 25 kg/m<sup>2</sup></b> | 1.636 (0.942, 2.842) | 0.081   | 2.286 (1.180, 4.426) | 0.014   |
| <b>All-cause mortality</b>           | <b>Low BWV</b>                                        | 1.008 (0.543, 1.869) | 0.980   | 0.933 (0.493, 1.759) | 0.831   |
|                                      | <b>Moderate BWV</b>                                   | Reference            |         | Reference            |         |
|                                      | <b>High BWV, BMI 20 - 24.9 kg/m<sup>2</sup></b>       | 1.425 (0.768, 2.642) | 0.262   | 1.618 (0.810, 3.232) | 0.173   |
|                                      | <b>High BWV, BMI &lt; 20 or ≥ 25 kg/m<sup>2</sup></b> | 2.078 (1.138, 3.796) | 0.017   | 2.124 (1.101, 4.095) | 0.025   |

Note: Models were adjusted for age, gender, Charlson comorbidity index, history of DM, smoking history, BMI, SBP, DBP, Medications (ACEi/ARBs, diuretics, Number of antihypertensive drugs), hemoglobin, albumin, HDL-cholesterol, triglycerides, fasting serum glucose, hs-CRP, 25(OH) vitamin D levels, eGFR, and 24-hour urine protein.

Abbreviations: BWV, body weight variability; CV, cardiovascular; CI, confidence interval.

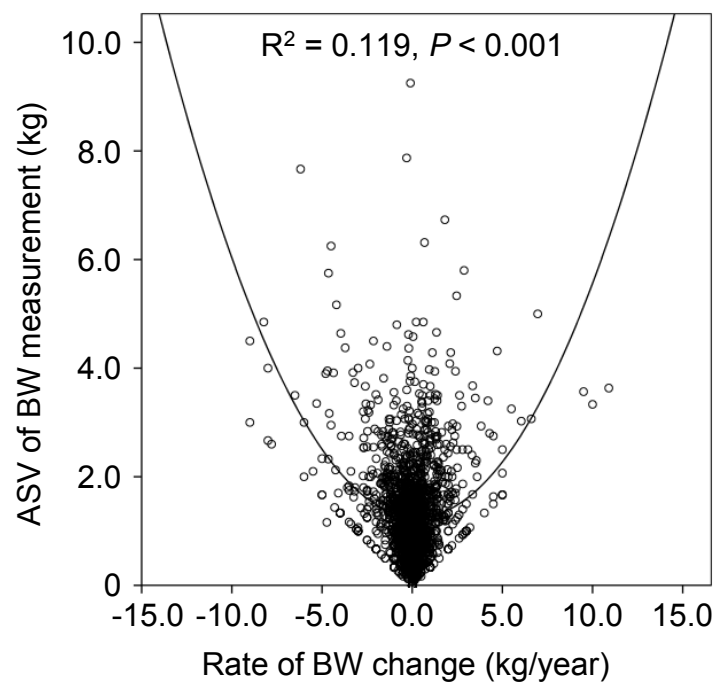

**Figure S1. Scatter plot for the correlations of BW slope with BWV**

Abbreviations: ASV, average successive variability; BW, body weight; BWV, body weight variability
